# Supplementary material for: Regulatory T cells and immune escape in HCC: understanding the tumor microenvironment and advancing CAR-T cell therapy
Source: PubMed Central journal article supplement (PMC11317284; doi:10.3389/fimmu.2024.1431211), 2024-07-29
Supplement: DataSheet_1.pdf [file DataSheet_1.pdf]

| Components    |                                          | Functions                                                                                                                                                                                                              |
|---------------|------------------------------------------|------------------------------------------------------------------------------------------------------------------------------------------------------------------------------------------------------------------------|
| Immune cells  | T cells                                  | CTLs directly kill tumors by secreting granzymes and perforins, while Tregs promote tumor cell escape directly by secreting cytokines (such as TGF- $\beta$ and IL-10) and by indirect pathways (such as CAF activity) |
|               | Natural killer cells (NK cells)          | Inhibit tumor progression through perforin and granzyme B                                                                                                                                                              |
|               | B cells                                  | Secrete antibodies and cytokines, participate in tumor immune response, and promote the differentiation of Treg                                                                                                        |
|               | Dendritic cells (DCs)                    | Modulation of immune responses through antigen presentation and cytokine secretion                                                                                                                                     |
|               | Neutrophils                              | Secrete IL-10 and CCL2 to promote tumor cell growth, metastasis and angiogenesis                                                                                                                                       |
|               | Macrophages                              | Regulate T cells by releasing cytokines (such as TGF- $\beta$ , IL-10) and chemokines (such as CCL22), thereby indirectly promoting tumor cell escape                                                                  |
| Stromal cells | Hepatic stellate cells (HSCs)            | After activation, it secretes angiogenic growth factors, promoting the formation of new blood vessels and supporting tumor growth                                                                                      |
| Tumor cells   | Cancer-associated fibroblasts (CAFs)     | Promotes tumor cell invasion and metastasis by secreting collagen and extracellular matrix proteins                                                                                                                    |
| Enzymes       | Glucose-6-phosphate dehydrogenase (G6PD) | Boosts metabolic pathways such as the pentose phosphate pathway, supporting tumor cell growth and DNA synthesis                                                                                                        |
|               | Matrix metalloproteinases (MMPs)         | Degrade extracellular matrix                                                                                                                                                                                           |

|                         |                                                             |                                                                                                                                                                                                 |
|-------------------------|-------------------------------------------------------------|-------------------------------------------------------------------------------------------------------------------------------------------------------------------------------------------------|
|                         |                                                             | and promote tumor metastasis                                                                                                                                                                    |
|                         | CD39,CD73                                                   | The synergistic effect of the two inhibits the function of effector T cells                                                                                                                     |
| Cellular factors        | Vascular endothelial growth factor (VEGF)                   | Stimulates new blood vessel formation, inhibits the antigen presentation function of dendritic cells, and enhances the immunosuppressive function of Treg                                       |
|                         | Transforming growth factor- $\beta$ (TGF- $\beta$ )         | Induces epithelial-mesenchymal transition (EMT) of liver cancer cells, enhances migration and invasion ability, and promotes immune escape                                                      |
|                         | Interferon- $\gamma$ (IFN- $\gamma$ )                       | Synergizes with IL-1 $\beta$ to enhance PD-L1 expression and reduce Treg suppressive activity                                                                                                   |
|                         | Interleukin 10 and Interleukin 35 (IL-10 and IL-35)         | Inhibits immune response by inhibiting cell proliferation, reducing the production of inflammatory mediators, promoting the development and function of Treg cells, and assisting immune escape |
| Immune-related proteins | Leukocyte function associated antigen-1 (LFA-1)             | Forms aggregates with dendritic cells, inhibiting the co-stimulation process between dendritic cells and effector T cells                                                                       |
| Ligands and receptors   | Programmed Death-1/Programmed Death - Ligand 1 (PD-1/PD-L1) | After binding, it transmits inhibitory signals, reduces T cell activity, proliferation and cytokine production, and helps tumor immune escape                                                   |
|                         | CD276                                                       | Inhibit T cell activity, reduce cytokine secretion, and stimulate angiogenesis                                                                                                                  |
|                         | CD40                                                        | Stimulates the production of cytokines and chemokines, thereby promoting anti-tumor effects                                                                                                     |

|             |                                                                                  |                                                                                                                                                                                        |
|-------------|----------------------------------------------------------------------------------|----------------------------------------------------------------------------------------------------------------------------------------------------------------------------------------|
|             | V-domain Ig suppressor of T-cell activation (VISTA)                              | Inhibit T cell proliferation and activation and Treg transformation, and reduce the production of cytokines                                                                            |
|             | 4-1BB                                                                            | Interaction with 4-1BBL enhances T cell proliferation, differentiation and effector function                                                                                           |
| Chemokines  | C-C Motif Chemokine Ligand 1 (CCL1)/Characteristic Chemokine Receptor 8 (CCR8)   | Enhance the immunosuppressive activity of Treg and promote tumor cell proliferation, anti-apoptosis and inflammatory response                                                          |
|             | C-C Motif Chemokine Ligand 22 (CCL22)/Characteristic Chemokine Receptor 4 (CCR4) | Recruited Tregs gather at tumor sites and induce local immune escape in hepatocellular carcinoma by secreting a large amount of IL-10 and TGF- $\beta$ while inhibiting IL-2 secretion |
| Metabolites | lactic acid                                                                      | Transform the tumor microenvironment into an environment suitable for tumor cell proliferation                                                                                         |
|             | Exosomes                                                                         | Promotes angiogenesis and tumor growth, regulates immune escape, and affects the tumor microenvironment                                                                                |
|             | Extracellular matrix                                                             | Helps tumor cells invade and metastasize, and promotes the metastasis of hepatocellular carcinoma                                                                                      |
